# Supplementary material
Source: PubMed Central journal article supplement (PMC2953050)

Supplementary Table 1: **Kinase null strains tested for role in Nab2 phosphorylation.**

| Number | Standard Name | Systematic Name | Number | Standard Name | Systematic Name |
|--------|---------------|-----------------|--------|---------------|-----------------|
| 1      | Akl1          | YBR059C         | 45     | Pho85         | YPL031C         |
| 2      | Ark1          | YNL020C         | 46     | Pkh1          | YDR490C         |
| 3      | Atg1          | YGL180W         | 47     | Pkh2          | YOL100W         |
| 4      | Bck1          | YJL095W         | 48     | Pkh3          | YDR466W         |
| 5      | Bud1          | YGR152C         | 49     | Prr1          | YKL116C         |
| 6      | Cka2          | YOR061W         | 50     | Prr2          | YDL214C         |
| 7      | Cmk1          | YFR014C         | 51     | Psk1          | YAL017W         |
| 8      | Cmk2          | YOL016C         | 52     | Psk2          | YOL045W         |
| 9      | Dan1          | YJR150C         | 53     | Ptk1          | YKL198C         |
| 10     | Dbf2          | YGR092W         | 54     | Ptk2          | YJR059W         |
| 11     | Dbf2          | YGR092W         | 55     | Rck1          | YGL158W         |
| 12     | Elm1          | YKL048C         | 56     | Rck2          | YLR248W         |
| 13     | Env7          | YPL236C         | 57     | Rim15         | YFL033C         |
| 14     | Fmp48         | YGR052W         | 58     | Rtk1          | YDL025C         |
| 15     | Fpk1          | YNR047W         | 59     | Sak1          | YER129W         |
| 16     | Fus3          | YBL016W         | 60     | Skm1          | YOL113W         |
| 17     | Gcn2          | YDR283C         | 61     | Slr2          | YHR030C         |
| 18     | Gin4          | YDR507C         | 62     | Snf1          | YDR477W         |
| 19     | Hal5          | YJL165C         | 63     | Sps1          | YDR523C         |
| 20     | Hog1          | YLR113W         | 64     | Ssk2          | YNR031C         |
| 21     | Hrk1          | YOR267C         | 65     | Ssk22         | YCR073C         |
| 22     | Hsl1          | YKL101W         | 66     | Ssn3          | YPL042C         |
| 23     | Ime2          | YJL106W         | 67     | Ste11         | YLR362W         |

|    |       |         |    |                     |         |
|----|-------|---------|----|---------------------|---------|
| 24 | Ire1  | YHR079C | 68 | Ste20               | YHL007C |
| 25 | Isr1  | YPR106W | 69 | Ste7                | YDL159W |
| 26 | Kcc4  | YCL024W | 70 | Swe1                | YJL187C |
| 27 | Kin1  | YDR122W | 71 | Tda1                | YMR291W |
| 28 | Kin2  | YLR096W | 72 | Tos3                | YGL179C |
| 29 | Kin3  | YAR018C | 73 | Tpk1                | YJL164C |
| 30 | Kin4  | YOR233W | 74 | Tpk2                | YPL203W |
| 31 | Kin82 | YCR091W | 75 | Tpk3                | YKL166C |
| 32 | Kka1  | YJL094C | 76 | Twf1                | YGR080W |
| 33 | Kns1  | YLL019C | 77 | Vhs1                | YDR247W |
| 34 | Ksp1  | YHR082C | 78 | Vps15               | YBR097W |
| 35 | Mck1  | YNL307C | 79 | Yak1                | YJL141C |
| 36 | Mds1  | YMR139W | 80 | Yck2                | YNL154C |
| 37 | Mek1  | YOR351C | 81 | Yck3                | YER123W |
| 38 | Mkk1  | YOR231W | 82 | Ygk3                | YOL128C |
| 39 | Mkk2  | YPL140C | 83 | Ypk1                | YKL126W |
| 40 | Mlp1  | YKL161C | 84 | Ypk2                | YMR104C |
| 41 | Mrk1  | YDL079C | 85 | Uncharacterized ORF | YPL150W |
| 42 | Nnk1  | YKL171W | 86 | Uncharacterized ORF | YBR028C |
| 43 | Npr1  | YNL183C | 87 | Uncharacterized ORF | YNL141C |
| 44 | Pak1  | YIL095W |    |                     |         |

Supplementary Table 2: *S. cerevisiae* strains used in this study

| Strain          | Genotype                                                                      | Reference/Source                                   |
|-----------------|-------------------------------------------------------------------------------|----------------------------------------------------|
| BY4742          | Mata <i>his3ΔI leu2Δ0 ura3ΔI lys2ΔI</i>                                       | Research Genetics                                  |
| Nab2-TAP        | <i>NAB2-TAP:HIS5</i> Mata <i>his3ΔI leu2Δ0 met15Δ0 ura3ΔI</i>                 | (Ghaemmaghani et al., 2003)                        |
| <i>bck1Δ</i>    | <i>BCK1::KAN</i> Mata <i>his3ΔI leu2Δ0 met15Δ0 ura3ΔI</i>                     | (Winzeler et al., 1999)                            |
| <i>slt2Δ</i>    | <i>SLT2::KAN</i> Mata <i>his3ΔI leu2Δ0 lys2Δ0 ura3ΔI</i>                      | (Winzeler et al., 1999)                            |
| <i>hog1Δ</i>    | <i>HOG1::KAN</i> Mata <i>his3ΔI leu2Δ0 met15Δ0 ura3ΔI</i>                     | (Winzeler et al., 1999)                            |
| <i>ypk1Δ</i>    | <i>YPK1::KAN</i> Mata <i>his3ΔI leu2Δ0 met15Δ0 ura3ΔI</i>                     | (Winzeler et al., 1999)                            |
| SWY4307         | <i>NAB2::HIS3</i> Mata <i>his3ΔI leu2Δ0 trp1Δ ura3ΔI</i> p(AC636)             | (Marfatia et al., 2003)<br>(Marfatia et al., 2003) |
| SWY4308         | <i>NAB2::HIS3</i> Mata <i>his3ΔI leu2Δ0 trp1Δ ura3ΔI</i> p(SW3579)            | This study                                         |
| SWY4309         | <i>NAB2::HIS3</i> Mata <i>his3ΔI leu2Δ0 trp1Δ ura3ΔI</i> p(SW3580)            | This study                                         |
| <i>SLT2-TAP</i> | <i>SLT2-TAP:HIS5</i> Mata <i>his3ΔI leu2Δ0 met15Δ0 ura3ΔI</i>                 | (Ghaemmaghani et al., 2003)                        |
| <i>BCK1-TAP</i> | <i>BCK1-TAP:HIS5</i> Mata <i>his3ΔI leu2Δ0 met15Δ0 ura3ΔI</i>                 | (Ghaemmaghani et al., 2003)                        |
| <i>MKK1-TAP</i> | <i>MKK1-TAP:HIS5</i> Mata <i>his3ΔI leu2Δ0 met15Δ0 ura3ΔI</i>                 | (Ghaemmaghani et al., 2003)                        |
| <i>YPK1-TAP</i> | <i>YPK1-TAP:HIS5</i> Mata <i>his3ΔI leu2Δ0 met15Δ0 ura3ΔI</i>                 | (Ghaemmaghani et al., 2003)                        |
| <i>nup42Δ</i>   | <i>NUP42::KAN</i> Mata <i>his3ΔI leu2Δ0 lys2Δ0 ura3ΔI</i>                     | (Winzeler et al., 1999)                            |
| SWY4493         | <i>NUP42::KAN NAB2::HIS3</i> Mata <i>his3ΔI leu2Δ0 trp1Δ ura3ΔI</i> p(AC636)  | This study                                         |
| SWY4494         | <i>NUP42::KAN NAB2::HIS3</i> Mata <i>his3ΔI leu2Δ0 trp1Δ ura3ΔI</i> p(SW3579) | This study                                         |
| SWY4495         | <i>NUP42::KAN NAB2::HIS3</i> Mata <i>his3ΔI leu2Δ0 trp1Δ ura3ΔI</i> p(SW3580) | This study                                         |

|                  |                                                                                 |                         |
|------------------|---------------------------------------------------------------------------------|-------------------------|
| SWY4552          | <i>NAB2-mCherry:HygB YRA1-GFP:HIS3</i> Mata <i>his3ΔI leu2Δ0 ura3ΔI</i>         | This study              |
| SWY4225          | <i>NAB2-mCherry:HygB MLP1-GFP:HIS3</i> Mata <i>his3ΔI leu2Δ0 ura3ΔI</i>         | This study              |
| SWY4034          | <i>NAB2-GFP:HIS5 MLP1::KAN</i> Matα <i>his3ΔI leu2Δ0 ura3ΔI</i>                 | This study              |
| <i>MEX67-GFP</i> | <i>MEX67-GFP:HIS5</i> Mata <i>his3ΔI leu2Δ0 met15Δ0 ura3ΔI</i>                  | (Huh et al., 2003)      |
| SWY4225          | <i>NAB2-mCherry:HygB MLP1-GFP:HIS3</i> Mata <i>his3ΔI leu2Δ0 met15Δ0 ura3ΔI</i> | This study              |
| SWY4251          | <i>NAB2-mCherry:HygB MLP1-GFP:HIS3 SLT2::KAN</i> Mata <i>leu2Δ0 ura3ΔI</i>      | This study              |
| <i>mlp1Δ</i>     | <i>MLP1::KAN</i> Matα <i>his3ΔI leu2Δ0 lys2Δ0 ura3ΔI</i>                        | (Winzeler et al., 1999) |
| <i>gfd1Δ</i>     | <i>GFD1::KAN</i> Matα <i>his3ΔI leu2Δ0 lys2Δ0 ura3ΔI</i>                        | (Winzeler et al., 1999) |
| pAC1152          | <i>NAB2::HIS3 p(nab2ΔN LEU2)</i> Mata <i>leu2 ura3</i>                          | (Marfatia et al., 2003) |

Supplementary Table 3: **Plasmids used in this study**

| Plasmid      | Description                              | Reference/Source             |
|--------------|------------------------------------------|------------------------------|
| pAC 636      | <i>NAB2 CEN LEU2 AMP</i>                 | (Green et al., 2002)         |
| pSW3579      | <i>nab2-T178A/S180A CEN LEU2 AMP</i>     | This study                   |
| pSW3580      | <i>nab2-T178E/S180E CEN LEU2 AMP</i>     | This study                   |
| Nab2-pGEX2TK | pGEX2TK GST- <i>NAB2</i> AMP             | (Lee and Aitchison, 1999)    |
| pSW3610      | pGEX2TK GST- <i>nab2 T178A/S180A</i> AMP | This study                   |
| pSW3629      | pGEX2TK GST- <i>nab2 T178E/S180E</i> AMP | This study                   |
| pSW3465      | 6x-HIS- <i>MTR2:MEX67</i> AMP            | This study                   |
| pSW1319      | GST-Dbp5 AMP                             | (Alcazar-Roman et al., 2006) |

Supplementary Figure 1: **Poly(A<sup>+</sup>) tail length is unaffected in *slt2Δ*, *nab2-T178A/S180A*, and *nab2-T178E/S180E*.** Total RNA was isolated from wild type, *slt2Δ*, *nab2-T178A/S180A*, and *nab2-T178E/S180E* cells grown at 23°C or after a 1 hr shift to 42°C. RNA was end-labeled with <sup>32</sup>pCp and T4 RNA ligase, and digested with RNase A and RNase T1 to remove non-poly(A<sup>+</sup>) tracks. Resulting stretches of poly(A<sup>+</sup>) were then resolved by denaturing urea-polyacrylamide gel electrophoresis and visualized by autoradiography. The position of the 70 nucleotide (nt) typical poly(A<sup>+</sup>) tail length is marked on the left.

Supplementary Figure 2: **Differential localization of NPC-associated proteins during heat shock.** Mlp2-GFP is localized in discrete intranuclear foci after shifting to growth at 42°C. Nup49-GFP and Nup60-GFP are localized to the nuclear rim during growth at 25°C and 42°C. Left column shows direct GFP fluorescence, and right column shows DIC.

Supplementary Figure 3: **Formation of intranuclear Nab2-GFP foci is dependent on Mlp1.** Yeast null mutants expressing Nab2-GFP were shifted from growth at 30°C to 42°C for 1 hr. Intranuclear foci formation was evaluated by direct fluorescence microscopy.

Supplementary Figure 4: **Production of heat shock proteins is not affected in *mlp1Δ* cells.** Wild type (lanes 1-2), *nup42Δ* (lane 3-4), *mlp1Δ* (lane 5-6), and *gfd1Δ* (lane 7-8) cells were grown at 23°C, shifted to 42°C for 15 min, and labeled with <sup>35</sup>S methionine for

an additional 15 min. Cell lysates were separated by SDS-PAGE and proteins were visualized by autoradiography. Asterisks at the right indicate proteins induced upon heat shock (Hsp104, Hsp82, and Hsp70s respectively.)

Supplemental Figure 5: **The nab2-T178E/S180E protein binds Mex67-Mtr2.** 6x-HIS-Mtr2/Mex67 was bound in batch to Ni<sup>2+</sup> agarose beads at 4°C, and divided equally into nine tubes. Purified recombinant wild type Nab2 (lanes 1-3), nab2-T178A/S180A (lanes 4-6), or nab2-T178E/S180E (lanes 7-9) protein was added to individual tubes in decreasing amounts of 0.5µg, 0.25µg, and 0.1µg. Samples were incubated for 1 hr at 4°C. Beads were washed, and boiled in SDS sample buffer to elute bound proteins. Mex67 was detected by Coomassie stained SDS-PAGE (A), and Nab2 was detected by immunoblotting (B).

**Alcazar-Roman, A. R., Tran, E. J., Guo, S. and Wentz, S. R.** (2006). Inositol hexakisphosphate and Gle1 activate the DEAD-box protein Dbp5 for nuclear mRNA export. *Nat. Cell Biol.* **8**, 711-716.

**Ghaemmaghami, S., Huh, W. K., Bower, K., Howson, R. W., Belle, A., Dephoure, N., O'Shea, E. K. and Weissman, J. S.** (2003). Global analysis of protein expression in yeast. *Nature* **425**, 671-672.

**Green, D. M., Marfatia, K. A., Crafton, E. B., Zhang, X., Cheng, X. and Corbett, A. H.** (2002). Nab2p is required for poly(A) RNA export in *Saccharomyces*

*cerevisiae* and is regulated by arginine methylation via Hmt1p. *J. Biol. Chem.* **277**, 7752-7760.

**Huh, W. K., Falvo, J. V., Gerke, L. C., Carroll, A. S., Howson, R. W., Weissman, J. S. and O'Shea, E. K.** (2003). Global analysis of protein localization in budding yeast. *Nature* **425**, 686-691.

**Lee, D. C. and Aitchison, J. D.** (1999). Kap104p-mediated nuclear import. Nuclear localization signals in mRNA-binding proteins and the role of Ran and RNA. *J. Biol. Chem.* **274**, 29031-29037.

**Marfatia, K. A., Crafton, E. B., Green, D. M. and Corbett, A. H.** (2003). Domain analysis of the *Saccharomyces cerevisiae* heterogeneous nuclear ribonucleoprotein, Nab2p. Dissecting the requirements for Nab2p-facilitated poly(A) RNA export. *J. Biol. Chem.* **278**, 6731-6740.

**Winzler, E. A., Shoemaker, D. D., Astromoff, A., Liang, H., Anderson, K., Andre, B., Bangham, R., Benito, R., Boeke, J. D., Bussey, H. et al.** (1999). Functional characterization of the *S. cerevisiae* genome by gene deletion and parallel analysis. *Science* **285**, 901-906.

# Supplemental Figure 1

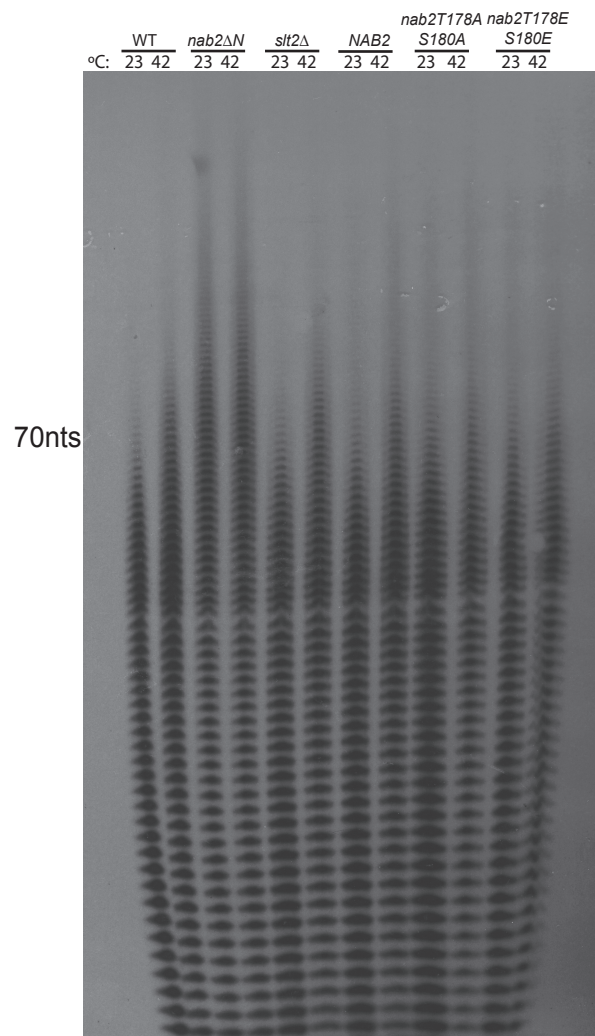



Supplemental Figure 2

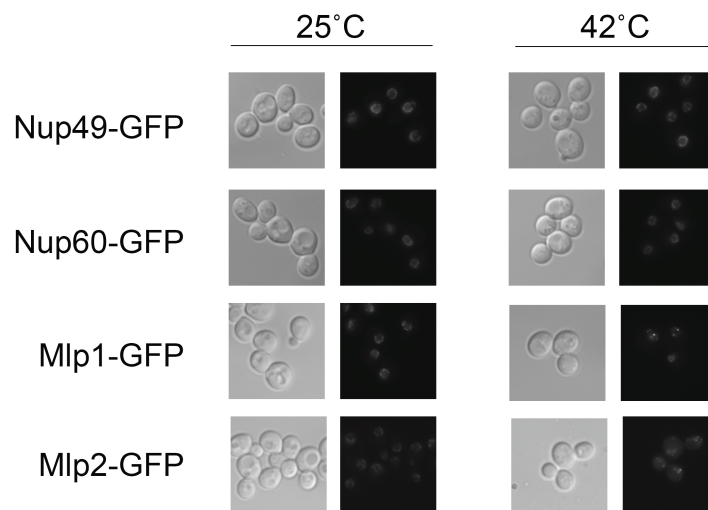

Supplemental Figure 3

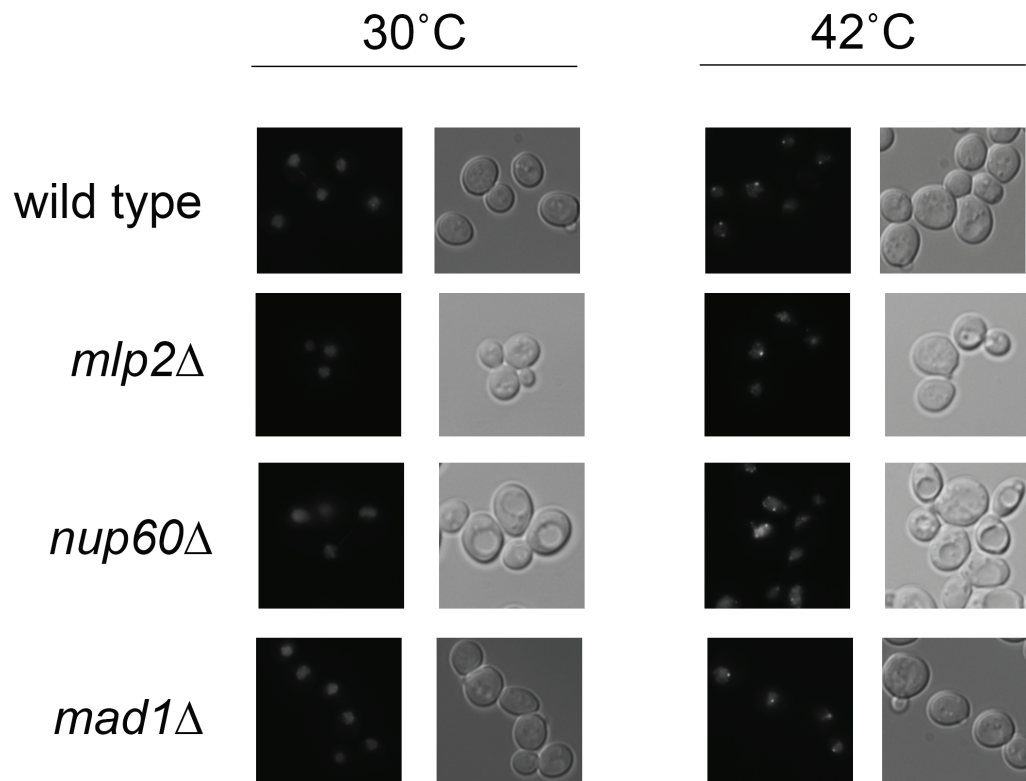

### Supplemental Figure 4

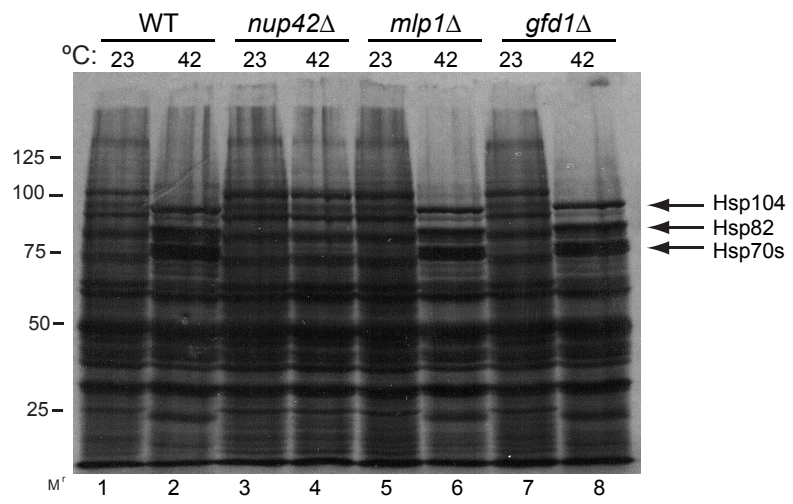

Supplemental Figure 5

A

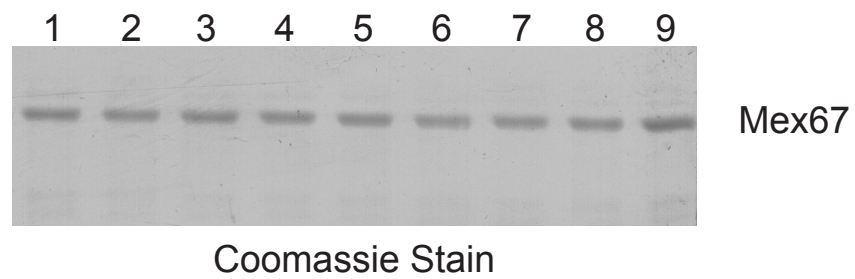

B

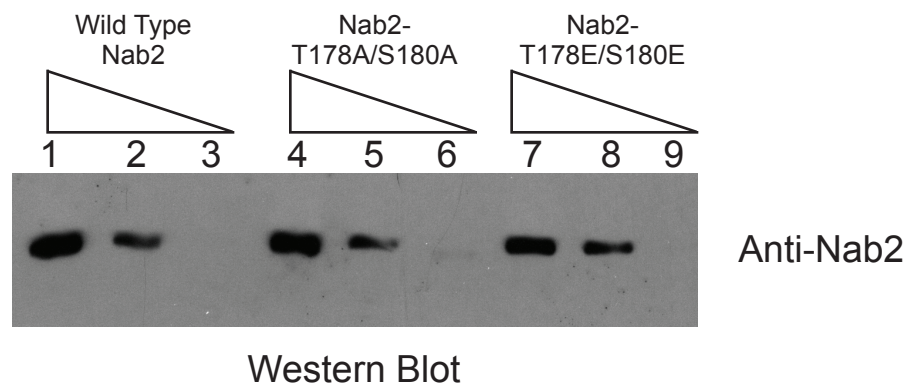

Supplement: supp_30_21_5168__1.pdf [file supp_30_21_5168__1.pdf]
